# Supplementary material
Source: publisher figshare collection journal article supplement (https://gsajournals.figshare.com/ndownloader/files/22768247)
Supplement: Supplementary file 1 [file 22768247]

## Sheet: File S2
BLS#	orf19 Code	New CGD Code	Name	MTL	Normalized White-to-Opaque Switching Frequency	Absolute White-to-Opaque Switching Frequency (%)	Colonies Scored White-to-Opaque Switching	White-to-Opaque Assay Batch	Average Wild Type White-to-Opaque Switching Frequency (%)	StDev Wild Type White-to-Opaque Switching Frequency (%)	Range Wild Type White-to-Opaque Switching Frequency (%)	White-to-Opaque P-Value	5-fold White-to-Opaque Effects	Normalized Opaque-to-White Switching Frequency	Absolute Opaque-to-White Switching Frequency(%)	Colonies Scored Opaque-to-White Switching	Opaque-to-White Assay Batch	Average Wild Type Opaque-to-White Switching Frequency (%)	StDev Wild Type Opaque-to-White Switching Frequency (%)	Range Wild Type Opaque-to-White Switching Frequency (%)	Opaque-to-White P-value	5-fold Opaque-to-White Effects	Opaque/White Enrichment, RNAseq (log2)	CGD Gene Annotation
BLS001	orf19.177	C1_06320W_A	C1_06320W_A	a/Δ	0.705629	6.17978	534	10	8.75782	0.385896	8.18-9.11	0.0012504	0	0.741951	6.82226	557	7	9.19503	0.626444	8.51-9.87	0.0155695	0	0.64	Has domain(s) with predicted phosphatidylinositol binding activity and role in cell communication
BLS002	orf19.5595	C6_03100W_A	SHE3	a/Δ	0.84891	5.625	480	6	6.62615	0.648492	5.66-7.39	0.46999	0	1.23432	6.53266	597	5	5.29251	0.351931	4.91-5.86	0.357015	0	0.5	mRNA-binding protein that localizes specific mRNAs to daughter yeast cells and to hyphal tips; required for normal filamentation and host epithelial cell damage; ortholog of S. cerevisiae She3 but target mRNAs differsæ
BLS003	orf19.6705	C7_03480W_A	C7_03480W_A	a/Δ	0.756071	3.09091	550	5	4.08812	0.813108	3.22-5.23	0.492036	0	0.965655	4.03727	644	4	4.18086	0.862349	2.84-5.23	0.904835	0	1.02	Predicted Guanyl-nucleotide exchange factor activity
BLS004	orf19.3793	C4_04860W_A	C4_04860W_A	a/Δ	0.633311	3.16369	727	7	4.99547	1.89387	2.33-7.68	0.191359	0	0.61546	3.25733	614	5	5.29251	0.351931	4.91-5.86	0.05574	0	-1.33	Unknown
BLS005	orf19.2685	C4_03070W_A	PGA54	a/Δ	0.401002	1.63934	549	5	4.08812	0.813108	3.22-5.23	0.00131172	0	0.578966	2.42057	661	4	4.18086	0.862349	2.84-5.23	0.0313247	0	0.08	Putative GPI-anchored cell wall protein
BLS006	orf19.2431	C1_06140C_A	C1_06140C_A	a/Δ	0.56362	2.30415	651	5	4.08812	0.813108	3.22-5.23	0.00870197	0	0.524242	2.19178	730	4	4.18086	0.862349	2.84-5.23	0.013597	0	2.42	Unknown
BLS007	orf19.5282	C1_11850W_A	C1_11850W_A	a/Δ	0.403407	1.64918	667	5	4.08812	0.813108	3.22-5.23	2.22e-06	0	0.448042	1.8732	694	4	4.18086	0.862349	2.84-5.23	0.00207948	0	-1.46	Unknown
BLS008	orf19.1354	C2_08290C_A	C2_08290C_A	a/Δ	0.964555	3.94322	634	5	4.08812	0.813108	3.22-5.23	0.903354	0	0.663526	2.77411	757	4	4.18086	0.862349	2.84-5.23	0.157489	0	-2.49	Unknown
BLS009	orf19.2459	C1_05900W_A	C1_05900W_A	a/Δ	0.525805	2.62664	533	7	4.99547	1.89387	2.33-7.68	0.0121063	0	0.610488	3.23102	619	5	5.29251	0.351931	4.91-5.86	0.102034	0	1.84	Unknown
BLS010	orf19.3460	C6_02200C_A	C6_02200C_A	a/Δ	0.645746	3.22581	682	7	4.99547	1.89387	2.33-7.68	0.123431	0	1.2646	6.69291	508	5	5.29251	0.351931	4.91-5.86	0.313132	0	-2.68	Unknown
BLS011	orf19.207	C2_08980C_A	PGA55	a/Δ	0.512275	2.55906	508	7	4.99547	1.89387	2.33-7.68	0.00747891	0	0.708548	3.75	720	5	5.29251	0.351931	4.91-5.86	0.0474251	0	0.7	GPI-anchored adhesin-like protein; filament induced; regulated by Nrg1, Tup1; regulated upon hyphal formation; mRNA binds to She3 and is localized to yeast-form buds and hyphal tips; induced during chlamydospore formation
BLS012	orf19.4765	C1_09080C_A	PGA6	a/Δ	0.559166	2.7933	537	7	4.99547	1.89387	2.33-7.68	0.024947	0	1.25964	6.66667	615	5	5.29251	0.351931	4.91-5.86	0.17296	0	0.23	GPI-anchored cell wall adhesin-like protein; induced by high iron; upregulated upon Als2 depletion; mRNA binds She3 and is localized to hyphal tips; Spider biofilm repressed
BLS013	orf19.6948	C3_03710W_A	CCC1	a/Δ	2.78129	11.3703	686	5	4.08812	0.813108	3.22-5.23	0.00651377	0	1.14626	4.79233	626	4	4.18086	0.862349	2.84-5.23	0.431648	0	0.18	Manganese transporter; required for normal filamentous growth; mRNA binds She3, localized to hyphal tips; repressed by NO, alkaline pH; colony morphology-related regulation by Ssn6; regulated by Sef1, Sfu1, Hap43; Spider biofilm induced
BLS014	orf19.1536	C2_02200W_A	ZRC1	a/Δ	0.737716	3.01587	630	5	4.08812	0.813108	3.22-5.23	0.35005	0	2.36515	9.88836	627	4	4.18086	0.862349	2.84-5.23	0.0171655	0	0.85	Predicted intracellular ion transporter
BLS015	orf19.1582	C2_02570W_A	C2_02570W_A	a/Δ	0.954157	3.90071	564	5	4.08812	0.813108	3.22-5.23	0.779543	0	0.671659	2.80811	641	4	4.18086	0.862349	2.84-5.23	0.0295254	0	-0.29	Predicted ion transporter
BLS016	orf19.6202	C1_07030C_A	RBT4	a/Δ	3.40235	13.9092	683	5	4.08812	0.813108	3.22-5.23	0.00810049	0	0.543603	2.27273	704	4	4.18086	0.862349	2.84-5.23	0.00913339	0	-2.54	Pry family protein; required for virulence in mouse systemic/rabbit corneal infections; not filamentation; mRNA binds She3, is localized to hyphal tips; Hap43-induced; in both yeast and hyphal culture supernatants; Spider biofilm induced
BLS017	orf19.5585	C6_03030W_A	SAP5	a/Δ	0.328656	1.64179	670	7	4.99547	1.89387	2.33-7.68	0.00196415	0	0.474458	2.51108	677	5	5.29251	0.351931	4.91-5.86	0.000126649	0	1.9	Secreted aspartyl proteinase; sap4,5,6 triple null defective in utilization of protein as N source; virulence role effected by URA3; expressed during infection; mRNA localized to hyphal tip via She3; rat catheter and Spider biofilm induced
BLS018	orf19.3707	CR_07790C_A	YHB1	a/Δ	0.691704	4.58333	480	6	6.62615	0.648492	5.66-7.39	0.00482123	0	0.735323	3.89171	591	5	5.29251	0.351931	4.91-5.86	0.139689	0	0.43	Nitric oxide dioxygenase; acts in nitric oxide scavenging/detoxification; role in virulence in mouse; transcript activated by NO, macrophage interaction; Hap43, hypha repressed; mRNA binds She3
BLS019	orf19.7228	C1_14200W_A	C1_14200W_A	a/Δ	0.0466623	0.2331	429	7	4.99547	1.89387	2.33-7.68	1.62e-06	1	0.918275	6.46688	634	8	7.04242	1.64477	5.04-9.52	0.843304	0	-0.47	Possible Golgi membrane protein; transcript positively regulated by Tbf1; mRNA binds She3
BLS020	orf19.6660	C5_03510C_A	C5_03510C_A	a/Δ	0.905967	3.7037	648	5	4.08812	0.813108	3.22-5.23	0.628347	0	0.419623	1.75439	627	4	4.18086	0.862349	2.84-5.23	0.00511048	0	-2.26	Protein of unknown function; mRNA binds to She3; Hap43-repressed; rat catheter and flow model biofilm induced
BLS021	orf19.3315	C1_01270W_A	CTA9	a/Δ	0.0771644	0.315457	634	5	4.08812	0.813108	3.22-5.23	4.78e-11	1	0.744868	3.11419	578	4	4.18086	0.862349	2.84-5.23	0.124607	0	-0.7	Protein required for normal filamentous growth; induced during the mating process; mRNA binds She3; activates transcription in 1-hybrid assay in S. cerevisiae
BLS022	orf19.3422	C6_01650C_A	FMP27	a/Δ	0.889495	3.63636	660	5	4.08812	0.813108	3.22-5.23	0.56748	0	0.981992	4.10557	682	4	4.18086	0.862349	2.84-5.23	0.939012	0	-0.17	Putative mitochondrial protein; mRNA binds She3
BLS023	orf19.3618	C2_08590W_A	YWP1	a/Δ	1.26679	5.17879	811	5	4.08812	0.813108	3.22-5.23	0.315075	0	0.974487	6.86275	612	8	7.04242	1.64477	5.04-9.52	0.918825	0	-0.75	Secreted yeast wall protein; possible role in dispersal in host; mutation increases adhesion and biofilm formation; propeptide; growth phase, phosphate, Ssk1/Ssn6/Efg1/Efh1/Hap43 regulated; mRNA binds She3; flow and Spider biofilm repressed
BLS024	orf19.660	C1_11430W_A	C1_11430W_A	a/Δ	0.850149	3.47551	633	5	4.08812	0.813108	3.22-5.23	0.634325	0	0.653888	2.73381	695	4	4.18086	0.862349	2.84-5.23	0.0953583	0	1.42	Protein of unknown function; mRNA binds She3
BLS025	orf19.5537	C6_02670C_A	WSC2	a/Δ	0.76102	3.80165	605	7	4.99547	1.89387	2.33-7.68	0.193479	0	0.867207	4.58971	719	5	5.29251	0.351931	4.91-5.86	0.360797	0	-1.24	Predicted stress receptor and cell wall maintenance
BLS027	orf19.113	C6_01070C_A	CIP1	a/Δ	2.69478	5.34759	374	1	1.98443	0.528054	1.22-2.68	0.04749	0	0.17365	0.671141	596	1	3.8649	1.78641	2.08-6.79	0.000169823	1	-0.3	Possible oxidoreductase; transcript induced by cadmium but not other heavy metals, heat shock, yeast-hypha switch, oxidative stress (via Cap1), or macrophage interaction; stationary phase enriched protein; Spider biofilm induced
BLS028	orf19.260	C3_02680C_A	SLD1	a/Δ	< 0.111	<0.365	274	8	3.29738	0.641657	2.42-3.96	7.64e-07	1	2.371	16.6976	539	8	7.04242	1.64477	5.04-9.52	0.00121017	0	0.01	Sphingolipid delta-8 desaturase; catalyzes desaturation at C8 in the long-chain base moiety of ceramides in glucosylceramide synthesis, important for virulence; ketoconazole and hypoxia induced; Hap43-repressed; Spider biofilm induced
BLS029	orf19.1239	C4_05580C_A	C4_05580C_A	a/Δ	1.00383	1.99203	251	1	1.98443	0.528054	1.22-2.68	0.936082	0	1.06331	4.10959	511	1	3.8649	1.78641	2.08-6.79	0.908116	0	6.31	Secreted protein; exogenously expressed protein is a substrate for Kex2 processing in vitro; fluconazole-regulated; Spider biofilm induced
BLS030	orf19.1345	C7_03300C_A	LIP8	a/Δ	0.63122	1.25261	958	1	1.98443	0.528054	1.22-2.68	0.0442274	0	0.731417	2.82686	566	1	3.8649	1.78641	2.08-6.79	0.217632	0	1.63	Secreted lipase, member of a differentially expressed lipase gene family with possible roles in nutrition and/or in creating an acidic microenvironment; LIP5 and LIP8 are expressed at all stages of both mucosal and systemic infection
BLS031	orf19.1586	C2_02600C_A	FGR22	a/Δ	1.18107	2.34375	512	1	1.98443	0.528054	1.22-2.68	0.530182	0	0.715213	2.76423	615	1	3.8649	1.78641	2.08-6.79	0.16361	0	0.1	Putative phosphatidylinositol-specific phospholipase C (PI-PLC); predicted type 2 membrane protein; no S. cerevisiae ortholog; role in, and regulated by, filamentation, Hap43p; almost identical to orf19.5797
BLS032	orf19.1860	CR_06760C_A	LSC2	a/Δ	0.990862	1.96629	356	1	1.98443	0.528054	1.22-2.68	0.881959	0	0.972702	3.7594	532	1	3.8649	1.78641	2.08-6.79	0.882512	0	1.16	Putative succinate-CoA ligase beta subunit; regulated by Mig1, Tup1; induced in high iron; protein present in exponential and stationary growth phase yeast cells; Spider biofilm repressed
BLS033	orf19.2156	C6_04590C_A	NAG1	a/Δ	1.22312	2.42718	206	1	1.98443	0.528054	1.22-2.68	0.671305	0	2.76671	10.6931	505	1	3.8649	1.78641	2.08-6.79	9.95e-05	0	4.75	Glucosamine-6-phosphate deaminase; required for normal hyphal growth and mouse virulence; converts glucosamine 6-P to fructose 6-P; reversible reaction in vitro; gene and protein is GlcNAc-induced; Spider biofilm induced
BLS034	orf19.3117	C4_06920C_A	CSA2	a/Δ	1.08734	5.43175	718	7	4.99547	1.89387	2.33-7.68	0.804115	0	0.958646	5.07365	611	5	5.29251	0.351931	4.91-5.86	0.763151	0	-1.09	Extracellular-associated protein; repressed by Rim101 at pH 8; regulated by Tsa1, Tsa1B in minimal media at 37 deg; induced by ketoconazole, nitric oxide, Hap43; required for normal RPMI biofilm formation; Bcr1 induced in RPMI
BLS035	orf19.3894	C5_04120C_A	C5_04120C_A	a/Δ	0.471839	0.93633	534	1	1.98443	0.528054	1.22-2.68	0.0348411	0	1.3758	5.31732	583	1	3.8649	1.78641	2.08-6.79	0.243408	0	0.08	Putative inositol oxygenase; mutation confers hypersensitivity to toxic ergosterol analog; Spider biofilm induced
BLS036	orf19.4072	C2_09130C_A	IFF6	a/Δ	0.969085	1.92308	364	1	1.98443	0.528054	1.22-2.68	0.943788	0	0.135702	0.524475	572	1	3.8649	1.78641	2.08-6.79	6.49e-05	1	6.19	Putative GPI-anchored adhesin-like protein; opaque-specific transcript; macrophage-induced gene; Hap43-repressed gene; Spider biofilm induced
BLS037	orf19.4774	C1_09160W_A	AOX1	a/Δ	0.679448	1.34831	445	1	1.98443	0.528054	1.22-2.68	0.159129	0	0.919588	3.55412	619	1	3.8649	1.78641	2.08-6.79	0.764099	0	0.18	Alternative oxidase; low abundance; constitutively expressed; one of two isoforms (Aox1p and Aox2p); involved in a cyanide-resistant respiratory pathway present in plants, protists, and some fungi, absent in S. cerevisiae; Hap43p-repressed
BLS038	orf19.4831	C1_09680W_A	MTS1	a/Δ	0.657855	2.1692	461	8	3.29738	0.641657	2.42-3.96	0.0582634	0	1.35614	8.43882	474	6	6.22269	1.50465	4.75-8.26	0.0554065	0	0.61	Sphingolipid C9-methyltransferase; catalyzes methylation of the 9th carbon in the long chain base component of glucosylceramides; glucosylceramide biosynthesis is important for virulence; Spider biofilm repressed
BLS039	orf19.4933	C1_13070C_A	FAD3	a/Δ	3.03991	6.03248	431	1	1.98443	0.528054	1.22-2.68	0.00174424	0	1.6474	6.36704	534	1	3.8649	1.78641	2.08-6.79	0.0506851	0	1.4	Omega-3 fatty acid desaturase; production of alpha-linolenic acid, a major component of membranes; caspofungin induced; Plc1-regulated; colony morphology-related gene regulation by Ssn6; Spider biofilm induced, flow model biofilm repressed
BLS040	orf19.4934	C1_13080W_A	OP4	a/Δ	1.10753	2.1978	364	1	1.98443	0.528054	1.22-2.68	0.858215	0	0.830622	3.21027	623	1	3.8649	1.78641	2.08-6.79	0.366689	0	7.92	Ala- Leu- and Ser-rich protein; secreted; N-terminal hydrophobic region; possible glycosylation; opaque-specific transcript; repressed by alpha pheromone in opaque MTLa homozygotes; fluconazole-induced; Spider biofilm induced
BLS041	orf19.5499	C2_06350C_A	C2_06350C_A	a/Δ	0.836389	1.65975	482	1	1.98443	0.528054	1.22-2.68	0.824831	0	0.910377	3.51852	540	1	3.8649	1.78641	2.08-6.79	0.589491	0	-0.19	Ortholog(s) have 4-hydroxyphenylpyruvate dioxygenase activity and role in aromatic amino acid family biosynthetic process
BLS042	orf19.5636	C4_00130W_A	RBT5	a/Δ	1.26508	2.51046	478	1	1.98443	0.528054	1.22-2.68	0.423611	0	1.05178	4.06504	492	1	3.8649	1.78641	2.08-6.79	0.985377	0	-3.25	GPI-linked cell wall protein; hemoglobin utilization; Rfg1, Rim101, Tbf1, Fe regulated; Sfu1, Hog1, Tup1, serum, alkaline pH, antifungal drugs, geldamycin repressed; Hap43 induced; required for RPMI biofilms; Spider biofilm induced
BLS043	orf19.5674	C4_00450C_A	PGA10	a/Δ	0.812229	5.38194	576	6	6.62615	0.648492	5.66-7.39	0.224678	0	0.62683	2.62069	725	4	4.18086	0.862349	2.84-5.23	0.0607889	0	-2.66	GPI anchored membrane protein; utilization of hemin and hemoglobin for Fe in host; Rim101 at ph8/hypoxia/ketoconazole/ciclopirox/hypha-induced; required for RPMI biofilm formation, Bcr1-induced in a/a biofilm; rat catheter biofilm repressed
BLS044	orf19.5728	C6_03600C_A	C6_03600C_A	a/Δ	0.890326	1.76678	283	1	1.98443	0.528054	1.22-2.68	0.662052	0	1.00065	3.8674	543	1	3.8649	1.78641	2.08-6.79	0.875016	0	7.01	Putative cytochrome P450; Spider biofilm induced
BLS045	orf19.6327	C6_00100C_A	HET1	a/Δ	0.381218	2.526	673	6	6.62615	0.648492	5.66-7.39	4.5e-06	0	1.89964	10.0539	557	5	5.29251	0.351931	4.91-5.86	0.0819761	0	-0.03	Putative sphingolipid transfer protein; involved in localization of glucosylceramide which is important for virulence; Spider biofilm repressed
BLS046	orf19.6673	C5_03610W_A	HEX1	a/Δ	1.28662	2.55319	235	1	1.98443	0.528054	1.22-2.68	0.623602	0	1.62388	6.27615	478	1	3.8649	1.78641	2.08-6.79	0.0353495	0	-0.28	Beta-N-acetylhexosaminidase/chitobiase, highly glycosylated enzyme that is secreted to the periplasm and culture medium; required for full virulence; may have role in carbon or nitrogen scavenging; possibly an essential gene (UAU1 method)
BLS047	orf19.7114	C7_00090C_A	CSA1	a/Δ	0.342475	2.26929	661	6	6.62615	0.648492	5.66-7.39	0.000797445	0	1.07008	5.66343	618	5	5.29251	0.351931	4.91-5.86	0.690269	0	-0.72	Surface antigen on elongating hyphae and buds; strain variation in repeat number; ciclopirox, filament induced, alkaline induced by Rim101; Efg1-, Cph1, Hap43-regulated; required for WT RPMI biofilm formation; Bcr1-induced in a/a biofilms
BLS049	orf19.30	C2_06540C_A	SPF1	a/Δ	0.721036	1.43084	629	1	1.98443	0.528054	1.22-2.68	0.323413	0	0.165858	0.641026	156	1	3.8649	1.78641	2.08-6.79	0.00174193	1	0.86	P-type calcium-transporting ATPase, involved in control of calcium homeostasis, response to ER stress, hyphal growth, biofilm formation and virulence
BLS050	orf19.101	C6_00990W_A	RIM9	a/Δ	0.788751	1.56522	575	1	1.98443	0.528054	1.22-2.68	0.388709	0	0.805597	3.11355	546	1	3.8649	1.78641	2.08-6.79	0.305806	0	-0.49	Protein required for alkaline pH response via the Rim101 signaling pathway; ortholog of S. cerevisiae Rim9 and A. nidulans palI; Spider biofilm induced
BLS051	orf19.176	CR_02490W_A	OPT4	a/Δ	0.617554	1.22549	408	1	1.98443	0.528054	1.22-2.68	0.152507	0	0.755766	2.92096	582	1	3.8649	1.78641	2.08-6.79	0.20158	0	7.5	Oligopeptide transporter; detected at germ tube plasma membrane; transcript inducede during phagocytosis by macrophages; fungal-specific; Hap43-repressed; merged with orf19.2292 in Assembly 20; rat catheter and Spider biofilm induced
BLS052	orf19.215	C2_08920W_A	C2_08920W_A	a/Δ	1.33785	2.65487	565	1	1.98443	0.528054	1.22-2.68	0.487366	0	0.240464	0.929368	538	1	3.8649	1.78641	2.08-6.79	0.000854564	0	0.03	Component of a complex containing the Tor2p kinase; possible a role in regulation of cell growth; Spider biofilm induced
BLS053	orf19.220	C2_08870C_A	PIR1	a/Δ	0.631484	1.25313	399	1	1.98443	0.528054	1.22-2.68	0.187111	0	0.746362	2.88462	624	1	3.8649	1.78641	2.08-6.79	0.227711	0	-1.11	1,3-beta-glucan-linked cell wall protein; N-mannosylated, O-glycosylated by Pmt1; cell wall defect in het mutant; Hog1/fluconazole/hypoxia induced; iron/Efg1/Plc1/temp regulated; flow model biofilm induced; hyphal, Spider biofilm repressed
BLS054	orf19.242	C3_02510C_A	SAP8	a/Δ	1.022	2.02808	641	1	1.98443	0.528054	1.22-2.68	0.900577	0	1.10493	4.27046	562	1	3.8649	1.78641	2.08-6.79	0.783924	0	-0.25	Secreted aspartyl protease; regulated by growth phase, temperature, white-opaque switch; highly expressed in opaque cells and upon deep epidermal invasion; greater expression in vaginal than oral infection; prominent role in biofilms
BLS055	orf19.433	C1_05320C_A	C1_05320C_A	a/Δ	1.05715	7.00483	414	6	6.62615	0.648492	5.66-7.39	0.941863	0	0.668179	3.53635	509	5	5.29251	0.351931	4.91-5.86	0.0203283	0	0.27	Ortholog(s) have Rab guanyl-nucleotide exchange factor activity, role in intra-Golgi vesicle-mediated transport, protein complex assembly and TRAPP complex, trans-Golgi network localization
BLS056	orf19.460	CR_05940W_A	CEK2	a/Δ	0.955718	1.89655	580	1	1.98443	0.528054	1.22-2.68	0.881625	0	1.41775	5.47945	511	1	3.8649	1.78641	2.08-6.79	0.247589	0	3.39	MAP kinase required for wild-type efficiency of mating; component of the signal transduction pathway that regulates mating; ortholog of S. cerevisiae Fus3; induced by Cph1, pheromone; transposon mutation affects filamentous growth
BLS057	orf19.469	CR_03900W_A	HST7	a/Δ	0.498935	0.990099	303	1	1.98443	0.528054	1.22-2.68	0.0603062	0	1.86143	7.19424	556	1	3.8649	1.78641	2.08-6.79	0.0875103	0	-0.14	MAP kinase kinase involved in mating and hyphal growth signal transduction pathways; phosphorylates Cek1p; wild-type virulence in mouse systemic infection; functional homolog of S. cerevisiae Ste7p; mutants are hypersensitive to caspofungin
BLS058	orf19.584	C5_00810C_A	C5_00810C_A	a/Δ	0.77558	2.28471	569	2	2.94581	1.15676	2.00-4.88	0.446516	0	0.773637	2.99003	602	1	3.8649	1.78641	2.08-6.79	0.375775	0	-0.54	Has domain(s) with predicted heme binding, peroxidase activity and role in oxidation-reduction process, response to oxidative stress
BLS059	orf19.663	C1_11400C_A	GIN4	a/Δ	1.67982	11.1307	566	6	6.62615	0.648492	5.66-7.39	0.00243142	0	0.959492	5.07812	512	5	5.29251	0.351931	4.91-5.86	0.746555	0	0.73	Autophosphorylated kinase; role in pseudohyphal-hyphal switch and cytokinesis; phosphorylates Cdc11p on S395; necessary for septin ring within germ tube but not for septin band at mother cell junction; physically associates with septins
BLS060	orf19.696	CR_06610W_A	STE2	a/Δ	2.53983	22.2433	526	10	8.75782	0.385896	8.18-9.11	0.00426889	0	1.23091	7.65957	470	6	6.22269	1.50465	4.75-8.26	0.350652	0	-0.16	Receptor for alpha factor mating pheromone, MFalpha; required for a-type cells to respond to alpha factor, for opaque a-form mating and white a-form response; possible Kex2p substrate; a-specific, alpha-factor induced, A1p-Alpha2p repressed
BLS061	orf19.728	CR_07580C_A	TSC11	a/Δ	1.19145	7.89474	570	6	6.62615	0.648492	5.66-7.39	0.318234	0	0.62042	3.28358	670	5	5.29251	0.351931	4.91-5.86	0.00109292	0	0.23	Protein similar to S. cerevisiae Tsc11p which is involved in sphingolipid biosynthesis; transposon mutation affects filamentous growth
BLS062	orf19.794	C2_04260W_A	SSN3	a/Δ	< 0.110	<0.324	309	2	2.94581	1.15676	2.00-4.88	2.14e-08	1	NA	NA	NA	NA	NA	NA	NA	NA	NA	-0.23	Putative cyclin-dependent protein kinase; mutants are sensitive to growth on H2O2 medium
BLS063	orf19.815	C2_04050C_A	DCK1	a/Δ	0.103505	0.341297	586	8	3.29738	0.641657	2.42-3.96	6.33e-05	1	1.02849	6.4	500	6	6.22269	1.50465	4.75-8.26	0.925534	0	0.32	Putative guanine nucleotide exchange factor; required for embedded filamentous growth; activates Rac1; has a DOCKER domain; similar to adjacent DCK2 and to S. cerevisiae Ylr422wp; regulated by Nrg1; Spider biofilm induced
BLS064	orf19.844	C2_03770C_A	STE11	a/Δ	0.300945	0.886525	564	2	2.94581	1.15676	2.00-4.88	0.000358232	0	1.70087	6.57371	502	1	3.8649	1.78641	2.08-6.79	0.140909	0	-0.09	Protein similar to S. cerevisiae Ste11p; mutants are sensitive to growth on H2O2 medium
BLS065	orf19.846	C2_03760C_A	C2_03760C_A	a/Δ	0.544233	1.60321	499	2	2.94581	1.15676	2.00-4.88	0.125017	0	1.27485	6.50685	584	2	5.10401	0.441533	4.65-5.62	0.22062	0	0	Predicted protein kinase similar to S. cerevisiae Nnk1; implicated in proteasome function in S. cerevisiae; induced by Mnl1 under weak acid stress
BLS066	orf19.852	C2_03680W_A	SAP98	a/Δ	0.47812	1.40845	497	2	2.94581	1.15676	2.00-4.88	0.0154424	0	0.793723	4.05117	469	2	5.10401	0.441533	4.65-5.62	0.209827	0	-1.26	Glycosyl-phosphatidylinositol-anchored aspartic endopeptidase; regulated by Gcn2p and Gcn4p; expressed only in opaque MTLa/MTLa cells
BLS067	orf19.896	C2_03320W_A	CHK1	a/Δ	0.782629	2.30548	347	2	2.94581	1.15676	2.00-4.88	0.489703	0	1.01736	5.19263	597	2	5.10401	0.441533	4.65-5.62	0.872316	0	0.15	Histidine kinase; 2-component signaling, cell wall synthesis; hyphal growth defect; avirulent in mouse, not rat vaginal infection; phagocytosis rate increased; Spider biofilm induced; required for RPMI biofilm; Bcr1-induced in a/a biofilm
BLS068	orf19.1036	C1_03730C_A	MNS1	a/Δ	0.304181	0.896057	558	2	2.94581	1.15676	2.00-4.88	0.00243262	0	0.205425	1.04849	763	2	5.10401	0.441533	4.65-5.62	5.07e-06	0	0.29	Alpha-1,2-mannosidase; processes Man9GlcNAc2 to Man8GlcNAc2 isomer B; member of ER localized glycosyl hydrolase family 47; ER form is converted by Kex2 to cytosolic form; flow model biofilm repressed
BLS069	orf19.1041	C1_04090C_A	C1_04090C_A	a/Δ	0.870199	5.76606	607	6	6.62615	0.648492	5.66-7.39	0.234151	0	0.763754	4.04218	569	5	5.29251	0.351931	4.91-5.86	0.0318473	0	-0.24	Ortholog(s) have cyclin-dependent protein serine/threonine kinase activity
BLS070	orf19.1264	C4_05780C_A	CFL2	a/Δ	0.592091	1.74419	516	2	2.94581	1.15676	2.00-4.88	0.138379	0	1.01499	5.18053	637	2	5.10401	0.441533	4.65-5.62	0.982496	0	-5.69	Oxidoreductase; iron utilization; Sfu1/Sef1/Hap43/Nrg1/Tup1/Rim101 regulated; alkaline/low iron/fluphenazine/ciclopirox olamine, flucytosine, fluconazole, Spider/flow model/rat catheter biofilm induced; caspofungin/amphotericin B repressed
BLS071	orf19.1341	C7_03340C_A	PRR2	a/Δ	0.301479	0.888099	563	2	2.94581	1.15676	2.00-4.88	0.000635371	0	0.609091	3.10881	579	2	5.10401	0.441533	4.65-5.62	0.0028866	0	-0.62	Putative serine/threonine protein kinase; mutation confers resistance to 5-fluorocytosine (5-FC)
BLS072	orf19.1364	C2_09870W_A	C2_09870W_A	a/Δ	1.46744	4.83871	372	8	3.29738	0.641657	2.42-3.96	0.278305	0	1.50562	9.36902	523	6	6.22269	1.50465	4.75-8.26	0.0304481	0	-0.37	Ortholog of S. pombe Stm1 G-protein coupled receptor; PQ-loop domains; constitutive expression independent of MTL or white-opaque status; Hap43-repressed
BLS073	orf19.1373	C2_09770C_A	INP51	a/Δ	0.601415	1.77165	508	2	2.94581	1.15676	2.00-4.88	0.0277574	0	1.75656	8.96552	580	2	5.10401	0.441533	4.65-5.62	0.025277	0	-0.33	Putative phosphatidylinositol-4,5-bisphosphate phosphatase; involved in maintenance of phosphoinositide levels; affects hyphal growth, virulence, cell integrity; interacts with Irs4p
BLS074	orf19.1382	C2_09700W_A	YEA4	a/Δ	0.601415	1.77165	508	2	2.94581	1.15676	2.00-4.88	0.120515	0	0.731668	3.73444	482	2	5.10401	0.441533	4.65-5.62	0.0407968	0	0.11	Putative uridine diphosphate-N-acetylglucosamine (UDP-GlcNAc) transporter; required for cell wall chitin synthesis; induced by alpha pheromone in SpiderM medium
BLS075	orf19.1490	C2_01780W_A	MSB2	a/Δ	0.0613862	0.180832	553	2	2.94581	1.15676	2.00-4.88	4.27e-07	1	1.14717	5.85516	649	2	5.10401	0.441533	4.65-5.62	0.181927	0	1.06	Mucin family adhesin-like protein; cell wall damage sensor; required for Cek1 phosphorylation by cell wall stress; Rim101-repressed; activation releases extracellular domain into medium; Spider biofilm induced
BLS076	orf19.1510	C2_01980C_A	SRD1	a/Δ	0.495623	3.28407	609	6	6.62615	0.648492	5.66-7.39	0.00145831	0	0.231633	1.22592	571	5	5.29251	0.351931	4.91-5.86	6.3e-06	0	0.77	Sur7 family protein with PalI-like domains; not required for stress responses; mutant is viable
BLS077	orf19.1567	C2_02440W_A	C2_02440W_A	a/Δ	1.56705	5.16717	658	8	3.29738	0.641657	2.42-3.96	0.290921	0	3.86275	24.0367	545	6	6.22269	1.50465	4.75-8.26	0.00111833	0	-0.16	Ortholog(s) have Rab guanyl-nucleotide exchange factor activity, phosphatidylinositol binding activity
BLS078	orf19.1621	C3_02240C_A	GPA2	a/Δ	< 0.114	<0.336	298	2	2.94581	1.15676	2.00-4.88	2.14e-08	1	0.557395	2.84495	703	2	5.10401	0.441533	4.65-5.62	0.00243526	0	-0.21	G-protein alpha subunit; regulates filamentous growth, copper resistance; involved in cAMP-mediated glucose signaling; reports differ on role in cAMP-PKA pathway, MAP kinase cascade; Gpr1 C terminus binds Gpa2; regulates HWP1 and ECE1
BLS079	orf19.1754	C2_10260C_A	CMK2	a/Δ	0.479503	3.17726	598	6	6.62615	0.648492	5.66-7.39	0.0217336	0	0.315494	1.66976	539	5	5.29251	0.351931	4.91-5.86	0.000904057	0	0.34	Putative calmodulin-dependent protein kinase; involved in cell wall integrity and oxidative stress response
BLS080	orf19.1814	CR_07090W_A	STT4	a/Δ	0.337441	0.994036	503	2	2.94581	1.15676	2.00-4.88	0.00523851	0	2.25811	11.5254	295	2	5.10401	0.441533	4.65-5.62	0.00051994	0	0.86	Putative phosphatidylinositol-4-kinase
BLS081	orf19.2020	C2_01020W_A	HGT6	a/Δ	0.803469	2.36686	338	2	2.94581	1.15676	2.00-4.88	0.462741	0	0.269497	1.37552	727	2	5.10401	0.441533	4.65-5.62	2.95e-06	0	-3.83	Putative high-affinity MFS glucose transporter; 20 family members; induced in core stress response; fluconazole, oralpharyngeal candidasis induced; flow model biofilm induced; Spider biofilm induced
BLS082	orf19.2021	C2_01010W_A	HGT8	a/Δ	0.343473	1.0118	593	2	2.94581	1.15676	2.00-4.88	0.000695074	0	1.15608	5.90062	644	2	5.10401	0.441533	4.65-5.62	0.583126	0	-2.98	High-affinity glucose transporter of the major facilitator superfamily; 20 members in the C. albicans glucose transporter family; 12 probable membrane-spanning segments; gene has intron; expressed in rich medium; flow model biofilm induced
BLS083	orf19.2443	C1_06020W_A	RGD1	a/Δ	0.905241	2.66667	525	2	2.94581	1.15676	2.00-4.88	0.720827	0	1.3512	6.89655	551	2	5.10401	0.441533	4.65-5.62	0.178107	0	-0.06	GTPase activator protein; transcript induced in low iron; alkaline upregulated; localized to the bud emergence area in G1 phase and in the bud tip during S and G2 phases
BLS084	orf19.2460	C1_05890W_A	C1_05890W_A	a/Δ	2.00952	5.91966	473	2	2.94581	1.15676	2.00-4.88	0.00816641	0	0.785063	4.00697	574	2	5.10401	0.441533	4.65-5.62	0.241298	0	7.74	Protein of unknown function; substrate for Kex2 processing in vitro; repressed by alpha pheromone in SpiderM medium; Spider biofilm induced; Bcr1-repressed in a/a RPMI biofilms
BLS085	orf19.2492	C1_05620C_A	STE3	a/Δ	0.855632	4.09483	464	9	4.78574	0.523568	3.93-5.35	0.551529	0	2.72089	16.9312	378	6	6.22269	1.50465	4.75-8.26	0.0121681	0	-0.58	Protein similar to S. cerevisiae Ste3p, the receptor for a-factor mating pheromone; alpha mating-type-specific transcription
BLS086	orf19.2538	CR_01520W_A	PTC2	a/Δ	1.86862	5.50459	436	2	2.94581	1.15676	2.00-4.88	0.126909	0	2.06236	10.5263	475	2	5.10401	0.441533	4.65-5.62	0.141574	0	-0.05	Protein phosphatase of the Type 2C-related family (serine/threonine-specific) with a potential role in DNA damage checkpoint control; localizes to both cytoplasm and mitochondria; mutant shows virulence defect
BLS087	orf19.2605	CR_02040W_A	PRK1	a/Δ	0.172756	0.508906	393	2	2.94581	1.15676	2.00-4.88	0.000220027	1	0.261232	1.33333	600	2	5.10401	0.441533	4.65-5.62	0.000158463	0	-0.3	Putative protein serine/threonine kinase; mutants sensitive to growth on hydrogen peroxide medium
BLS088	orf19.2613	CR_02130W_A	ECM4	alpha/Δ	1.03795	4.24328	707	5	4.08812	0.813108	3.22-5.23	0.738472	0	1.80756	6.89655	609	9	3.8154	1.10089	1.96-4.99	0.00106412	0	0.05	Cytoplasmic glutathione S-transferase; regulated by Nrg1, Tup1; induced in core stress response, in cyr1 or ras1 mutant (yeast or hyphal cells); Tn mutation affects filamentous growth; stationary phase enriched; Spider biofilm induced
BLS089	orf19.2726	C4_02720C_A	C4_02720C_A	a/Δ	0.165056	0.486224	617	2	2.94581	1.15676	2.00-4.88	5.55e-05	1	0.946846	4.83271	538	2	5.10401	0.441533	4.65-5.62	0.676474	0	-4.73	Putative plasma membrane protein; Plc1-regulated; Spider biofilm induced
BLS090	orf19.2771	C4_02310W_A	BEM3	a/Δ	0.957139	2.81955	532	2	2.94581	1.15676	2.00-4.88	0.533534	0	0.791294	4.03877	619	2	5.10401	0.441533	4.65-5.62	0.613447	0	0.48	Putative GTPase-activating protein (GAP) for Rho-type GTPase Cdc42p; involved in cell signaling pathways that control cell polarity; similar to S. cerevisiae Bem3p
BLS091	orf19.2781	C1_07640C_A	C1_07640C_A	a/Δ	0.509426	3.37553	474	6	6.62615	0.648492	5.66-7.39	3.05e-06	0	0.813813	4.30712	534	5	5.29251	0.351931	4.91-5.86	0.42636	0	0.72	Protein with predicted serine/threonine kinase and tyrosine kinase domains; possibly an essential gene, disruptants not obtained by UAU1 method; Spider biofilm induced
BLS092	orf19.2787	C1_07580C_A	PRY1	a/Δ	1.07355	5.77689	502	3	5.38113	1.04017	3.69-6.24	0.614792	0	1.25392	6.4	625	2	5.10401	0.441533	4.65-5.62	0.573326	0	7.15	Pry family pathogenesis-related protein; extracellular; opaque specific transcript; repressed by alpha pheromone in SpiderM medium; possibly essential, disruptants not obtained by UAU1 method; Spider biofilm induced
BLS093	orf19.2886	C4_06480C_A	CEK1	a/Δ	0.0893002	0.591716	507	6	6.62615	0.648492	5.66-7.39	3.13e-11	1	4.89759	30.4762	735	6	6.22269	1.50465	4.75-8.26	3.94e-06	0	2.95	ERK-family protein kinase; required for wild-type yeast-hypha switch, mating efficiency, virulence in mice; Cst20-Hst7-Cek1-Cph1 MAPK pathway regulates mating, and invasive hyphal growth under some conditions; Spider biofilm induced
BLS094	orf19.2941	C1_02520W_A	SCW4	a/Δ	0.520545	2.80112	357	3	5.38113	1.04017	3.69-6.24	0.0856742	0	1.12524	5.74324	592	2	5.10401	0.441533	4.65-5.62	0.397466	0	7.5	Putative cell wall protein; substrate for Kex2p processing in vitro; expression regulated by white-opaque switch; alkaline repressed; possibly essential (UAU1 method); flow model biofilm induced; Spider biofilm induced
BLS095	orf19.2952	C1_02630C_A	EXG2	a/Δ	1.48943	8.9983	589	11	6.04146	0.328233	5.47-6.25	0.0821732	0	1.18948	4.53834	639	9	3.8154	1.10089	1.96-4.99	0.30667	0	1.88	GPI-anchored cell wall protein, similar to S. cerevisiae exo-1,3-beta-glucosidase Exg2p; predicted Kex2p substrate; induced during cell wall regeneration; possibly an essential gene, disruptants not obtained by UAU1 method; Hap43p-repressed
BLS096	orf19.3049	C1_03470C_A	C1_03470C_A	a/Δ	0.844703	4.54545	594	3	5.38113	1.04017	3.69-6.24	0.347158	0	1.0816	5.5205	634	2	5.10401	0.441533	4.65-5.62	0.627699	0	0.49	Ortholog(s) have protein kinase activity, role in activation of bipolar cell growth, ascospore wall assembly, protein phosphorylation and cell division site, cytosol, nucleus, prospore membrane localization
BLS097	orf19.3207	C5_01680C_A	CCN1	a/Δ	0.119067	0.788955	507	6	6.62615	0.648492	5.66-7.39	4.75e-09	1	0.0999977	0.704225	426	8	7.04242	1.64477	5.04-9.52	8.52e-08	1	0.41	G1 cyclin; required for hyphal growth maintenance (not initiation); cell-cycle regulated transcription (G1/S); Cdc28p-Ccn1p initiates Cdc11p S394 phosphorylation on hyphal induction; expression in S. cerevisiae inhibits pheromone response
BLS098	orf19.3395	C6_01870C_A	C6_01870C_A	a/Δ	1.12414	6.04915	529	3	5.38113	1.04017	3.69-6.24	0.476027	0	0.625291	3.19149	564	2	5.10401	0.441533	4.65-5.62	0.0600722	0	-1.5	Predicted MFS membrane transporter, member of the drug:proton antiporter (12 spanner) (DHA1) family; induced by nitric oxide, oxidative stress, alpha pheromone; fungal-specific; Hap43-repressed; Spider biofilm induced
BLS099	orf19.3396	C6_01860C_A	HCH1	a/Δ	1.28162	6.89655	551	3	5.38113	1.04017	3.69-6.24	0.102008	0	1.71385	8.74751	503	2	5.10401	0.441533	4.65-5.62	0.0120628	0	-0.09	Ortholog of S. cerevisiae Hch1, a regulator of heat shock protein Hsp90; regulated by Gcn4; induced in response to amino acid starvation (3-aminotriazole treatment); mutants are viable
BLS100	orf19.3575	C2_05460W_A	CDC19	a/Δ	0.652052	3.50877	570	3	5.38113	1.04017	3.69-6.24	0.232773	0	1.28894	3.54132	593	3	2.74746	0.146279	2.56-2.94	0.267841	0	-0.07	Pyruvate kinase at yeast cell surface; Gcn4/Hog1/GlcNAc regulated; Hap43/polystyrene adherence induced; repressed by phagocytosis/farnesol; hyphal growth role; stationary phase enriched; flow model biofilm induced; Spider biofilm repressed
BLS101	orf19.3763	C1_12530C_A	C1_12530C_A	a/Δ	1.19452	7.91506	518	6	6.62615	0.648492	5.66-7.39	0.311958	0	0.48365	2.55973	586	5	5.29251	0.351931	4.91-5.86	0.000375131	0	-0.07	Has domain(s) with predicted serine-type endopeptidase activity and integral to membrane localization
BLS102	orf19.3765	C1_12510W_A	RAX2	a/Δ	1.27779	8.46682	437	6	6.62615	0.648492	5.66-7.39	0.271347	0	1.32974	7.03764	611	5	5.29251	0.351931	4.91-5.86	0.0541537	0	0.78	Plasma membrane protein involved in establishment of bud sites and linear direction of hyphal growth; filament induced, repressed by Rim101, Tup1; Hap43-induced; Spider biofilm induced
BLS103	orf19.3803	C4_04770C_A	MNN22	a/Δ	0.808723	2.66667	225	8	3.29738	0.641657	2.42-3.96	0.676016	0	1.35359	8.42294	558	6	6.22269	1.50465	4.75-8.26	0.12437	0	-5.4	Alpha-1,2-mannosyltransferase; required for normal cell wall mannan; regulated by Tsa1, Tsa1B at 37 deg; repressed in core stress response; NO, Hog1 induced; confers sensitivity to cell wall perturbing agents; Spider biofilm repressed
BLS104	orf19.3829	C4_04530C_A	PHR1	a/Δ	1.1927	7.20562	569	11	6.04146	0.328233	5.47-6.25	0.416969	0	1.36705	5.21583	556	9	3.8154	1.10089	1.96-4.99	0.230647	0	1.7	Cell surface glycosidase; may act on cell-wall beta-1,3-glucan prior to beta-1,6-glucan linkage; role in systemic, not vaginal virulence (neutral, not low pH); high pH or filamentation induced; Bcr1-repressed in RPMI a/a biofilm
BLS105	orf19.3895	C5_04130C_A	CHT2	a/Δ	3.00451	16.1677	334	3	5.38113	1.04017	3.69-6.24	0.0115139	0	0.195334	0.536673	559	3	2.74746	0.146279	2.56-2.94	1.97e-05	1	1.48	GPI-linked chitinase; required for normal filamentous growth; repressed in core caspofungin response; fluconazole, Cyr1, Efg1, pH-regulated; mRNA binds She3 and is localized to yeast-form buds and hyphal tips; Spider biofilm repressed
BLS106	orf19.3936	C5_04510W_A	GDE1	a/Δ	0.489898	2.6362	569	3	5.38113	1.04017	3.69-6.24	0.000387834	0	0.99567	2.73556	329	3	2.74746	0.146279	2.56-2.94	0.972492	0	1.47	Glycerophosphocholine phosphodiesterase; mutation confers hypersensitivity to 5-fluorouracil (5-FU); F-12/CO2 early biofilm induced
BLS107	orf19.3995	C5_05030C_A	RIM13	a/Δ	0.499724	2.68908	595	3	5.38113	1.04017	3.69-6.24	0.000645209	0	1.24156	3.41113	557	3	2.74746	0.146279	2.56-2.94	0.165313	0	-0.35	Protease of the pH response pathway; likely to mediate activation of Rim101 via C-terminal cleavage; required for alkaline pH-induced hyphal growth and for normal chlamydospore formation; Hap43-repressed; flow model biofilm induced
BLS108	orf19.4002	C5_05100C_A	DUN1	a/Δ	0.964679	3.18091	503	8	3.29738	0.641657	2.42-3.96	0.800071	0	2.45139	15.2542	236	6	6.22269	1.50465	4.75-8.26	0.0224086	0	-0.03	Protein similar to S. cerevisiae Dun1p, which is a serine-threonine protein kinase involved in DNA damage cell-cycle checkpoint; induced under Cdc5p depletion
BLS109	orf19.4012	C5_05190W_A	PCL5	alpha/Δ	0.121992	0.262467	381	4	2.15151	0.755852	1.09-3.59	0.000355029	1	0.0897589	0.342466	292	9	3.8154	1.10089	1.96-4.99	2.76e-06	1	-1.55	Putative cyclin for Pho85 kinase; Gcn4-induced; suppresses toxicity of C. albicans Gcn4 overproduction in S. cerevisiae via increased Pho85-dependent phosphorylation and degradation of Gcn4; rat catheter and Spider biofilm induced
BLS110	orf19.4015	C5_05220W_A	CAG1	a/Δ	0.718652	2.36967	422	8	3.29738	0.641657	2.42-3.96	0.254417	0	2.34539	14.5946	740	6	6.22269	1.50465	4.75-8.26	0.00235399	0	0.88	heterotrimeric G protein alpha subunit; positive role in mating pheromone response; opaque-enriched transcript; transcript repressed by MTLa1-MTLalpha2; regulated by hemoglobin-responsive Hbr1 via MTL genes; rat catheter biofilm repressed
BLS111	orf19.4035	C5_05390C_A	PGA4	a/Δ	1.74818	5.76441	399	8	3.29738	0.641657	2.42-3.96	0.089505	0	0.754105	4.69256	618	6	6.22269	1.50465	4.75-8.26	0.0488418	0	0.62	GPI-anchored cell surface protein; beta-1,3-glucanosyltransferase with similarity to the A. fumigatus GEL family; transcript induced in RHE model of oral candidiasis; fluconazol-induced
BLS112	orf19.4084	C2_09230C_A	KIS1	a/Δ	0.929379	3.06452	620	8	3.29738	0.641657	2.42-3.96	0.880839	0	1.62112	10.0877	684	6	6.22269	1.50465	4.75-8.26	0.052733	0	-0.51	Snf1p complex scaffold protein; similar to S. cerevisiae Gal83p and Sip2p with regions of similarity to Sip1p (ASC and KIS domain); interacts with Snf4p; mutants are hypersensitive to caspofungin and hydrogen peroxide; Hap43p-repressed gene
BLS113	orf19.4185	C4_00580W_A	C4_00580W_A	alpha/Δ	1.18502	2.54958	353	4	2.15151	0.755852	1.09-3.59	0.721743	0	1.40252	5.35117	598	9	3.8154	1.10089	1.96-4.99	0.246489	0	-0.72	Ortholog(s) have phosphoprotein phosphatase activity, thiosulfate sulfurtransferase activity, role in DNA-dependent DNA replication, protein dephosphorylation, regulation of DNA-dependent DNA replication and cytosol, nucleus localization
BLS114	orf19.4188	C4_00540C_A	NMD5	a/Δ	0.122663	0.660066	303	3	5.38113	1.04017	3.69-6.24	3.63e-06	1	0.062971	0.17301	578	3	2.74746	0.146279	2.56-2.94	8.88e-08	1	-0.1	Karyopherin; carrier protein involved in nuclear import of proteins; repressed in core stress response; Hap43-induced; Spider biofilm induced
BLS115	orf19.4211	C6_00480C_A	FET31	a/Δ	0.235234	1.26582	474	3	5.38113	1.04017	3.69-6.24	6.84e-05	0	1.1136	3.05958	621	3	2.74746	0.146279	2.56-2.94	0.571305	0	2.05	Putative multicopper oxidase; ketoconazole/caspofungin/amphotericin B repressed; Sef1/Sfu1/Hap43 regulated; reports differ if functional homolog of ScFet3; rat catheter and Spider biofilm induced
BLS116	orf19.4242	C5_02340C_A	CST20	a/Δ	0.802806	4.32	625	3	5.38113	1.04017	3.69-6.24	0.219402	0	1.02613	2.81924	603	3	2.74746	0.146279	2.56-2.94	0.918606	0	0.4	Protein kinase of Ste20p/p65PAK family, required for wild-type mating efficiency and virulence in a mouse model; Cst20p-Hst7p-Cek1p-Cph1p MAPK pathway regulates some hyphal growth; involved in Cdc42p growth regulation
BLS117	orf19.4248	C5_02400W_A	C5_02400W_A	a/Δ	1.25282	6.74157	623	3	5.38113	1.04017	3.69-6.24	0.450301	0	3.30858	20.5882	748	6	6.22269	1.50465	4.75-8.26	0.000207829	0	-0.09	Ortholog of S. cerevisiae YLR118C (alias Apt1); acyl-protein thioesterase responsible for depalmitoylation of Gpa1 in S. cerevisiae; regulated by Gcn4; repressed in response to amino acid starvation (3AT); rat catheter biofilm repressed
BLS118	orf19.4292	C5_02720W_A	PEP12	a/Δ	0.662888	2.18579	183	8	3.29738	0.641657	2.42-3.96	0.220395	0	5.20011	32.3587	513	6	6.22269	1.50465	4.75-8.26	4.09e-06	1	-0.28	Predicted target membrane receptor (t-SNARE) involved in vacuolar transport, endocytosis, and secretion; required for biofilm formation in RPMI-1640 and for virulence
BLS119	orf19.4308	C5_02840C_A	HSL1	a/Δ	< 0.047	<0.324	309	3	5.38113	1.04017	3.69-6.24	1.15e-08	1	NA	NA	NA	NA	NA	NA	NA	NA	NA	0.1	Probable protein kinase involved in determination of morphology during the cell cycle of both yeast-form and hyphal cells via regulation of Swe1p and Cdc28p; required for full virulence and kidney colonization in mouse systemic infection
BLS120	orf19.4424	C1_07430W_A	PHO100	a/Δ	0.683216	3.67647	408	3	5.38113	1.04017	3.69-6.24	0.266336	0	0.792475	2.17729	643	3	2.74746	0.146279	2.56-2.94	0.553883	0	1.1	Putative inducible acid phosphatase; DTT-extractable and observed in culture supernatant in low-phosphate conditions; slight effect on murine virulence; virulence-group-correlated expression; N-glycosylated; F-12/CO2 early biofilm induced
BLS121	orf19.4444	C1_07230W_A	PHO15	alpha/Δ	0.9049	1.9469	565	4	2.15151	0.755852	1.09-3.59	0.74112	0	6.71841	25.6334	671	9	3.8154	1.10089	1.96-4.99	6.26e-05	1	0.91	4-nitrophenyl phosphatase, possible histone H2A phosphatase; involved in regulation of white-opaque switch; hyphal repressed; induced in core stress response; induced by cadmium stress via Hog1; rat catheter and Spider biofilm repressed
BLS122	orf19.4593	C4_02000C_A	RGA2	a/Δ	0.48317	2.6	500	3	5.38113	1.04017	3.69-6.24	0.0469862	0	0.895446	2.4602	691	3	2.74746	0.146279	2.56-2.94	0.786021	0	0.19	Putative GTPase-activating protein (GAP) for Rho-type GTPase Cdc42; involved in cell signaling pathways controlling cell polarity; induced by low-level peroxide stress; flow model biofilm induced
BLS123	orf19.4720	C1_08620W_A	CTR2	alpha/Δ	0.503837	1.08401	369	4	2.15151	0.755852	1.09-3.59	0.235493	0	1.0312	3.93443	610	9	3.8154	1.10089	1.96-4.99	0.859366	0	-0.64	Putative low-affinity copper transporter of the vacuolar membrane; induced by nitric oxide; clade-associated gene expression; rat catheter and flow model biofilm induced
BLS124	orf19.4744	C1_08860C_A	C1_08860C_A	alpha/Δ	1.87718	4.03877	619	4	2.15151	0.755852	1.09-3.59	0.0912348	0	0.853569	3.25671	522	9	3.8154	1.10089	1.96-4.99	0.618396	0	-0.37	Putative phosphatidylinositol 3-phosphate (PI3P) phosphatase; repressed by alpha pheromone in SpiderM medium
BLS125	orf19.4755	C1_08990C_A	KEX2	a/Δ	< 0.061	<0.202	496	8	3.29738	0.641657	2.42-3.96	7.64e-07	1	2.69988	10.3011	631	9	3.8154	1.10089	1.96-4.99	0.00574705	0	0.14	Subtilisin-like protease (proprotein convertase); processes aspartyl proteinase Sap2; required for hyphal growth and wild-type virulence in mice; functional homolog of S. cerevisiae Kex2, which processes alpha-factor; Tup1-repressed
BLS126	orf19.4772	C1_09140C_A	SSU81 (SHO1)	a/Δ	0.0907987	0.488599	614	3	5.38113	1.04017	3.69-6.24	1.52e-07	1	0.699947	1.92308	572	3	2.74746	0.146279	2.56-2.94	0.545471	0	0.68	Predicted adaptor protein involved in activation of MAP kinase-dependent signaling pathways; links response to oxidative stress to morphogenesis and cell wall biosynthesis; caspofungin repressed
BLS127	orf19.4785	C1_09260C_A	PTC1	a/Δ	0.0929174	0.5	600	3	5.38113	1.04017	3.69-6.24	6.68e-07	1	1.51972	4.17537	479	3	2.74746	0.146279	2.56-2.94	0.174602	0	-0.27	Putative protein phosphatase of the Type 2C-related family (serine/threonine-specific), similar to S. cerevisiae Ptc1p; mutant shows virulence defect
BLS128	orf19.4843	C1_09780C_A	C1_09780C_A	a/Δ	0.480903	2.5878	541	3	5.38113	1.04017	3.69-6.24	0.00803952	0	0.462922	1.27186	629	3	2.74746	0.146279	2.56-2.94	0.0350558	0	-0.82	Putative iron/copper reductas; involved in iron homeostasis; rat catheter and Spider biofilm induced
BLS129	orf19.4866	C1_10000C_A	CPP1	a/Δ	4.44205	9.55711	429	4	2.15151	0.755852	1.09-3.59	0.00372851	0	1.07465	4.10023	439	9	3.8154	1.10089	1.96-4.99	0.898037	0	0.54	VH1 family MAPK phosphatase; regulates Cst20-Hst7-Cek1-Cph1 filamentation pathway; represses yeast-hyphal switch; required for virulence in mice; yeast-enriched; induced by alpha pheromone in SpiderM medium; Spider biofilm induced
BLS130	orf19.4890	C1_10210C_A	CLA4	a/Δ	1.08313	5.18359	463	9	4.78574	0.523568	3.93-5.35	0.752836	0	0.519232	3.23102	619	6	6.22269	1.50465	4.75-8.26	0.026372	0	0.61	Ste20p family Ser/Thr kinase required for wild-type filamentous growth, organ colonization and virulence in mouse systemic infection; role in chlamydospore formation; functional homolog of S. cerevisiae Cla4p; mutant caspofungin sensitive
BLS131	orf19.5068	C1_07970C_A	IRE1	a/Δ	2.46704	5.30786	471	4	2.15151	0.755852	1.09-3.59	0.0443287	0	1.3107	3.60111	361	3	2.74746	0.146279	2.56-2.94	0.1788	0	0.05	Putative protein kinase; role in cell wall regulation; mutant is hypersensitive to caspofungin; Spider biofilm induced
BLS132	orf19.5170	C7_02910W_A	ENA21	a/Δ	3.72312	8.01034	387	4	2.15151	0.755852	1.09-3.59	0.019986	0	0.712508	1.95759	613	3	2.74746	0.146279	2.56-2.94	0.374979	0	2	Predicted P-type ATPase sodium pump; Gcn4p-regulated; flucytosine, amphotericin B, or ketoconazole-induced; osmotic stress-induced; overlaps orf19.5170.1, which is annotated as a blocked reading frame; Spider biofilm induced
BLS133	orf19.5181	C7_02800W_A	NIK1	a/Δ	2.77321	5.96659	419	4	2.15151	0.755852	1.09-3.59	0.0420482	0	0.216328	0.594354	673	3	2.74746	0.146279	2.56-2.94	0.000105397	0	0.47	Histidine kinase involved in a two-component signaling pathway that regulates cell wall biosynthesis; required for wild-type virulence in mouse systemic infection but not for wild-type growth or drug sensitivity/resistance; 9 HAMP domains
BLS134	orf19.5200	C1_04380W_A	SIT4	a/Δ	0.0470618	0.225225	444	9	4.78574	0.523568	3.93-5.35	7.06e-06	1	2.22344	8.48329	389	9	3.8154	1.10089	1.96-4.99	0.0140367	0	-0.22	Serine/threonine protein phosphatase catalytic subunit; has a role in cell wall maintenance, hyphal growth, and virulence in a mouse systemic infection model
BLS135	orf19.5224	C1_12410C_A	PKH2	a/Δ	6.67474	14.3608	571	4	2.15151	0.755852	1.09-3.59	0.000431045	1	0.930456	2.55639	665	3	2.74746	0.146279	2.56-2.94	0.671821	0	-0.54	Putative serine/threonine protein kinase; predicted role in sphingolipid-mediated signaling pathway that controls endocytosis; mRNA binds She3 and is localized to hyphal tips
BLS136	orf19.5406	C3_00570C_A	C3_00570C_A	a/Δ	8.93549	19.2248	645	4	2.15151	0.755852	1.09-3.59	0.000534032	1	0.699947	1.92308	520	3	2.74746	0.146279	2.56-2.94	0.217815	0	-1.09	Predicted plasma membrane associated protein phosphatase; required for normal filamentous growth; mRNA binds She3 and is localized to hyphal tips
BLS137	orf19.5634	C4_00110C_A	FRP1	a/Δ	2.14783	4.62107	541	4	2.15151	0.755852	1.09-3.59	0.0259991	0	2.43853	6.69975	403	3	2.74746	0.146279	2.56-2.94	0.0484739	0	-1.78	Ferric reductase; alkaline-induced by Rim101; iron-chelation-induced by CCAAT-binding factor; fluconazole-repressed; ciclopirox-, hypoxia-, Hap43-induced; colony morphology-related regulation by Ssn6; Spider and flow model biofilm induced
BLS138	orf19.5661	C4_00340W_A	PTC7	a/Δ	1.05266	2.26481	574	4	2.15151	0.755852	1.09-3.59	0.869061	0	1.1509	3.16206	506	3	2.74746	0.146279	2.56-2.94	0.372353	0	0.04	Protein phosphatase, type 2C; has S/T phosphatase activity, Mn2+/Mg2+ dependent; predicted membrane-spanning segment and mitochondrion-targeting signal
BLS139	orf19.5760	C6_03850C_A	IHD1	a/Δ	1.32043	2.84091	352	4	2.15151	0.755852	1.09-3.59	0.599823	0	1.05064	2.8866	485	3	2.74746	0.146279	2.56-2.94	0.853964	0	1.84	GPI-anchored protein; alkaline, hypha-induced; regulated by Nrg1, Rfg1, Tup1 and Tsa1, Tsa1B in minimal media at 37; oralpharyngeal candidasis induced ; Spider biofilm induced; regulated in Spider biofilms by Tec1, Efg1, Ndt80, Rob1, Brg1
BLS140	orf19.5994	C3_05180W_A	RHB1	a/Δ	0.209837	0.451467	443	4	2.15151	0.755852	1.09-3.59	0.000237029	0	1.99619	5.48446	547	3	2.74746	0.146279	2.56-2.94	0.0559429	0	1.31	Putative small G protein from the Ras superfamily involved in cell wall integrity and control of filamentous growth under nitrogen starvation
BLS141	orf19.6001	C3_05230W_A	SAP3	a/Δ	0.472747	2.26244	442	9	4.78574	0.523568	3.93-5.35	0.0131402	0	0.930259	5.78871	691	6	6.22269	1.50465	4.75-8.26	0.636241	0	0.92	Secreted aspartyl proteinase, acts in utilization of protein as nitrogen source; assessment of virulence role complicated by URA3 effects; regulated by growth phase; produced by opaque phase cells; alpha-pheromone repressed
BLS142	orf19.6232	C1_06780W_A	NPR1	a/Δ	2.07867	4.47227	559	4	2.15151	0.755852	1.09-3.59	0.115659	0	0.659371	1.81159	552	3	2.74746	0.146279	2.56-2.94	0.0940941	0	-0.81	Predicted serine/threonine protein kinase, involved in regulation of ammonium transport; induced in core stress response; Hap43p-repressed gene
BLS143	orf19.6245	C1_06660W_A	C1_06660W_A	a/Δ	0.82507	1.77515	338	4	2.15151	0.755852	1.09-3.59	0.29193	0	1.37733	5.75843	712	4	4.18086	0.862349	2.84-5.23	0.0394332	0	-1.8	Protein of unknown function; regulated by osmotic stress via Hog1 and oxidative stress (Hog1- and Cap1-independent); induced by alpha pheromone in SpiderM medium; Spider biofilm induced
BLS144	orf19.6313	CR_04800W_A	MNT4	a/Δ	0.680029	3.25444	338	9	4.78574	0.523568	3.93-5.35	0.0604619	0	0.682629	4.24779	565	6	6.22269	1.50465	4.75-8.26	0.0504032	0	-0.02	Predicted alpha-1,3-mannosyltransferase with a role in protein glycosylation; induced in low iron
BLS145	orf19.6365	CR_08070W_A	PTP1	a/Δ	1.58373	3.40741	675	4	2.15151	0.755852	1.09-3.59	0.0995635	0	1.35516	5.66572	706	4	4.18086	0.862349	2.84-5.23	0.35268	0	-0.21	Phosphotyrosine-specific protein phosphatase; rat catheter biofilm induced
BLS146	orf19.6376	CR_08160W_A	PTC5	a/Δ	1.76822	3.80435	552	4	2.15151	0.755852	1.09-3.59	0.290783	0	1.11595	4.66563	643	4	4.18086	0.862349	2.84-5.23	0.508222	0	0.62	Mitochondrial protein phosphatase of the Type 2C-related family (serine/threonine-specific), involved in drug response and cadmium tolerance
BLS147	orf19.6420	CR_08510W_A	PGA13	a/Δ	1.18137	5.65371	283	9	4.78574	0.523568	3.93-5.35	0.635603	0	0.627366	3.9039	666	6	6.22269	1.50465	4.75-8.26	0.131798	0	4.4	GPI-anchored cell wall protein involved in cell wall synthesis; required for normal cell surface properties; induced in oralpharyngeal candidasis; Spider biofilm induced; Bcr1-repressed in RPMI a/a biofilms
BLS148	orf19.6842	C1_04480C_A	TUS1	a/Δ	< 0.022	<0.182	548	4	2.15151	0.755852	1.09-3.59	3.74e-13	1	0.928056	3.88007	567	4	4.18086	0.862349	2.84-5.23	0.795091	0	-0.15	Putative guanine nucleotide exchange factor; induced by Mnl1 under weak acid stress; Spider biofilm induced
BLS149	orf19.6928	C3_03870C_A	SAP9	a/Δ	0.440832	2.1097	711	9	4.78574	0.523568	3.93-5.35	0.00951217	0	0.986991	6.14173	635	6	6.22269	1.50465	4.75-8.26	0.913282	0	-0.03	Secreted aspartyl protease; roles in adhesion, cell surface integrity; induced by antifungal drugs, stationary phase, or in white-phase cells; farnesol-downregulated in biofilm; autocatalytic processing; GPI-anchor; Spider biofilm induced
BLS150	orf19.6951	C3_03680W_A	C3_03680W_A	a/Δ	0.734605	3.51562	256	9	4.78574	0.523568	3.93-5.35	0.419942	0	0.53927	3.3557	596	6	6.22269	1.50465	4.75-8.26	0.0327522	0	-0.67	Ortholog(s) have sphinganine-1-phosphate aldolase activity and role in calcium-mediated signaling, cellular response to starvation, sphingolipid metabolic process
BLS151	orf19.6980	C3_05420W_A	C3_05420W_A	alpha/Δ	0.635455	1.36719	512	4	2.15151	0.755852	1.09-3.59	0.0204998	0	1.13955	4.34783	621	9	3.8154	1.10089	1.96-4.99	0.5209	0	-0.28	Has domain(s) with predicted ATP binding, protein tyrosine kinase activity and role in protein phosphorylation
BLS152	orf19.7033	C7_00840C_A	C7_00840C_A	a/Δ	0.625077	2.99145	468	9	4.78574	0.523568	3.93-5.35	0.0269414	0	1.40707	8.75576	651	6	6.22269	1.50465	4.75-8.26	0.292792	0	-0.01	Putative dual specificity protein phosphatase, similar to S. cerevisiae Pps1p
BLS153	orf19.7071	C7_00480W_A	FGR2	a/Δ	1.21187	2.60736	652	4	2.15151	0.755852	1.09-3.59	0.354311	0	0.722499	3.02067	629	4	4.18086	0.862349	2.84-5.23	0.181015	0	7.91	Protein similar to phosphate transporters; transposon mutation affects filamentous growth; expression is regulated upon white-opaque switching
BLS154	orf19.7105	C7_00180W_A	FAR1	a/Δ	0.487964	4.2735	585	10	8.75782	0.385896	8.18-9.11	0.00501862	0	0.768781	7.06897	580	7	9.19503	0.626444	8.51-9.87	0.395318	0	0.31	Protein involved in regulation of pheromone-mediated mating; repressed by A1p and Alpha2p in white-phase cells; null mutant shows no pheromone response in opaque cells; overexpression causes enhanced pheromone response and cell cycle arrest
BLS155	orf19.7206	C1_13990W_A	OCA6	a/Δ	0.395566	0.851064	470	4	2.15151	0.755852	1.09-3.59	0.0315435	0	0.370256	1.54799	646	4	4.18086	0.862349	2.84-5.23	0.000213091	0	-0.37	Putative protein phosphatase of the PTP family (tyrosine-specific), similar to S. cerevisiae Oca6p; mutant shows virulence defect
BLS156	orf19.7208	C1_14010W_A	CSK1	a/Δ	0.960614	2.06677	629	4	2.15151	0.755852	1.09-3.59	0.972084	0	1.11434	4.6589	601	4	4.18086	0.862349	2.84-5.23	0.528161	0	-0.15	Putative mitogen-activated protein (MAP) kinase with an unknown role; null mutant produces wrinkled colonies; similar to S. cerevisiae Smk1p, which is a protein kinase required for sporulation
BLS157	orf19.7218	C1_14120C_A	RBE1	a/Δ	0.686503	3.28542	487	9	4.78574	0.523568	3.93-5.35	0.160947	0	0.238078	1.48148	675	6	6.22269	1.50465	4.75-8.26	4.46e-06	0	0.42	Pry family cell wall protein; Rim101, Efg1, Ssn6, alkaline repressed; O-glycosylation; no GPI anchor predicted; ketoconazol induced; regulated by Sef1, Sfu1, Hap4; flow model biofilm induced; rat catheter and Spider biofilm repressed
BLS158	orf19.7281	CR_08860W_A	PDK2	alpha/Δ	1.71615	3.69231	325	4	2.15151	0.755852	1.09-3.59	0.00589975	0	1.06694	4.0708	565	9	3.8154	1.10089	1.96-4.99	0.731175	0	0.02	Putative pyruvate dehydrogenase kinase; mutation confers hypersensitivity to amphotericin B
BLS159	orf19.7523	CR_00120C_A	MKC1	a/Δ	1.65678	14.5098	510	10	8.75782	0.385896	8.18-9.11	0.0164263	0	0.381276	3.50584	599	7	9.19503	0.626444	8.51-9.87	1.24e-06	0	-0.1	MAP kinase; role in biofilm formation, contact-induced invasive filamentation, systemic virulence in mouse, cell wall structure/maintenance, caspofungin response; phosphorylated on surface contact, membrane perturbation, or cell wall stress
BLS160	orf19.7610	CR_10340W_A	PTP3	a/Δ	1.29941	2.7957	465	4	2.15151	0.755852	1.09-3.59	0.693557	0	1.17056	4.89396	613	4	4.18086	0.862349	2.84-5.23	0.616255	0	1.36	Putative protein tyrosine phosphatase; hypha induced; alkaline induced; regulated by Efg1, Ras1, cAMP pathways; mutants are viable; Spider biofilm induced; rat catheter biofilm repressed; flow model biofilm repressed
BLS161	orf19.5542	C6_02710C_A	SAP6	a/Δ	0.675603	3.23326	433	9	4.78574	0.523568	3.93-5.35	0.252353	0	0.792671	7.28863	686	7	9.19503	0.626444	8.51-9.87	0.157732	0	-1.95	Secreted aspartyl protease; expressed during hyphal growth, oral carriage, infection; sap4,5,6 triple mutant defective in protein utilization as N source; virulence role affecte by URA3; N-glycosylated; rat catheter biofilm induced
BLS162	orf19.3374	C4_03470C_A	ECE1	a/Δ	0.344619	3.01811	497	10	8.75782	0.385896	8.18-9.11	0.00075431	0	0.186436	1.71429	350	7	9.19503	0.626444	8.51-9.87	1.48e-08	1	-0.57	Hypha-specific protein; regulated by Rfg1, Nrg1, Tup1, Cph1, Efg1, Hog1, farnesol, phagocytosis; fluconazole-induced; rat catheter and Spider biofilm induced; flow model biofilm repressed; Bcr1-repressed in RPMI a/a biofilms
BLS163	orf19.6928	C3_03870C_A	SAP9	a/Δ	0.848221	7.42857	525	10	8.75782	0.385896	8.18-9.11	0.571602	0	0.672175	6.18067	631	7	9.19503	0.626444	8.51-9.87	0.07379	0	-0.03	Secreted aspartyl protease; roles in adhesion, cell surface integrity; induced by antifungal drugs, stationary phase, or in white-phase cells; farnesol-downregulated in biofilm; autocatalytic processing; GPI-anchor; Spider biofilm induced
BLS165	orf19.756	C1_04870W_A	SAP7	a/Δ	0.883075	7.73381	556	10	8.75782	0.385896	8.18-9.11	0.644424	0	0.428427	3.93939	660	7	9.19503	0.626444	8.51-9.87	2.04e-06	0	-0.08	Pepstatin A-insensitive secreted aspartyl protease; self-processing; expressed in human oral infection; Ssn6p-regulated; role in murine intravenous infection; induced during, but not required for, murine vaginal infection; N-glycosylated
BLS166	orf19.5741	C6_03700W_A	ALS1	a/Δ	0.391605	3.4296	554	10	8.75782	0.385896	8.18-9.11	0.000310013	0	1.102	10.1329	602	7	9.19503	0.626444	8.51-9.87	0.541176	0	1.78	Cell-surface adhesin; adhesion, virulence, immunoprotective roles; band at hyphal base; Rfg1, Ssk1, Spider biofilm induced; flow model biofilm repressed; CAI-4 strain background effects; promoter bound Bcr1, Tec1, Efg1, Ndt80, and Brg1
BLS167	orf19.6420	CR_08510W_A	PGA13	a/Δ	4.00796	35.101	396	10	8.75782	0.385896	8.18-9.11	0.0421997	0	0.472845	4.34783	276	7	9.19503	0.626444	8.51-9.87	0.0130757	0	4.4	GPI-anchored cell wall protein involved in cell wall synthesis; required for normal cell surface properties; induced in oralpharyngeal candidasis; Spider biofilm induced; Bcr1-repressed in RPMI a/a biofilms
BLS168	orf19.1321	C4_03570W_A	HWP1	a/Δ	0.95673	8.37887	549	10	8.75782	0.385896	8.18-9.11	0.745629	0	0.172626	1.5873	315	7	9.19503	0.626444	8.51-9.87	3.91e-05	1	-0.93	Hyphal cell wall protein; host transglutaminase substrate; opaque-, a-specific, alpha-factor induced; at MTLa side of conjugation tube; virulence complicated by URA3 effects; Bcr1-repressed in RPMI a/a biofilms; Spider biofilm induced
BLS169	orf19.7053	C7_00660W_A	GAC1	a/Δ	0.395441	3.4632	462	10	8.75782	0.385896	8.18-9.11	0.00600534	0	0.719977	6.62021	574	7	9.19503	0.626444	8.51-9.87	0.0436054	0	3.74	Putative regulatory subunit of ser/thr phosphoprotein phosphatase 1; fluconazole-induced; caspofungin repressed; transcript induced by Mnl1 under weak acid stress; regulated by Nrg1, Tup1; Spider and flow model biofilm induced
BLS170	orf19.721	CR_06450W_A	CR_06450W_A	a/Δ	0.14797	1.2959	463	10	8.75782	0.385896	8.18-9.11	2.63e-10	1	0.511384	4.70219	638	7	9.19503	0.626444	8.51-9.87	0.000635145	0	0.15	Ortholog(s) have polynucleotide 5'-hydroxyl-kinase activity
BLS171	orf19.4526	C1_01990W_A	HSP30	a/Δ	0.716281	6.27306	542	10	8.75782	0.385896	8.18-9.11	0.0383361	0	0.277435	2.55102	588	7	9.19503	0.626444	8.51-9.87	4.87e-09	0	1.54	Putative heat shock protein; fluconazole repressed; amphotericin B induced; Spider biofilm induced; rat catheter biofilm induced
BLS172	orf19.4551	C1_01740W_A	CTN1	a/Δ	0.857352	7.50853	586	10	8.75782	0.385896	8.18-9.11	0.399104	0	0.83257	7.6555	627	7	9.19503	0.626444	8.51-9.87	0.352027	0	0.47	Carnitine acetyl transferase; required for growth on nonfermentable carbon sources, not for hyphal growth or virulence in mice; induced in macrophage; macrophage/pseudohyphal-repressed after 16 hr; rat catheter, Spider biofilm induced
BLS173	orf19.4599	C4_01940W_A	PHO89	a/Δ	1.49317	13.0769	520	10	8.75782	0.385896	8.18-9.11	0.0295274	0	1.13166	10.4056	567	7	9.19503	0.626444	8.51-9.87	0.31945	0	7.97	Putative phosphate permease; transcript regulated upon white-opaque switch; alkaline induced by Rim101; possibly adherence-induced; F-12/CO2 model, rat catheter and Spider biofilm induced
BLS174	orf19.4456	C1_07120W_A	GAP4	a/Δ	1.12069	9.81481	540	10	8.75782	0.385896	8.18-9.11	0.429129	0	0.558909	5.13919	467	7	9.19503	0.626444	8.51-9.87	0.00306269	0	-1.06	Putative amino acid permease; hyphal induced; regulated by Hap43, Gcn2 and Gcn4; colony morphology-related gene regulation by Ssnp; detected at plasma membrane of yeast and germ tube by mass spec; Spider biofilm induced
BLS175	orf19.5110	C1_08310W_A	OPY2	a/Δ	< 0.179	<0.206	486	12	1.1499	0.278862	0.87-1.60	0.000117807	1	0.929257	24.515	567	10	26.3813	6.39476	18.90-34.51	0.353087	0	0.91	Predicted transmembrane protein; role in cell wall biogenesis; required for Cek1 phosphorylation; Spider biofilm induced
